# Supplementary material for: Hydrothermal synthesis of well-crystallized CuO hierarchical structures and their direct application in high performance lithium-ion battery electrodes without further calcination
Source: Royal Society of Chemistry journal article supplement (doi:10.1039/c6ra20701d), 2016-01-01
Supplement: c6ra20701d1.pdf [file c6ra20701d1.pdf]

## Supplementary Information

### Hydrothermal synthesis of well-crystallized CuO hierarchical structures and their direct application in high performance lithium-ion battery electrodes without further calcination

Hequan Wang,<sup>a</sup> Tangwen Liang,<sup>a,c</sup> Xiao Yu,<sup>c</sup> Wenxia Zhao,<sup>b</sup> Ruimei Xu,<sup>b</sup> Donghai Wang<sup>c</sup> and Yong Liu<sup>\*c</sup>

<sup>a</sup>School of Mechatronics Engineering, Shenyang Aerospace University, Shenyang 110136, China

<sup>b</sup>Instrumental Analysis & Research Center, Sun Yat-sen University, Guangzhou 510275, China

<sup>c</sup>Institute for Solar Energy System, State Key Laboratory of Optoelectronic Materials and Technologies, Sun Yat-sen University, Guangzhou 510275, China. E-mail: liuyong7@mail.sysu.edu.cn

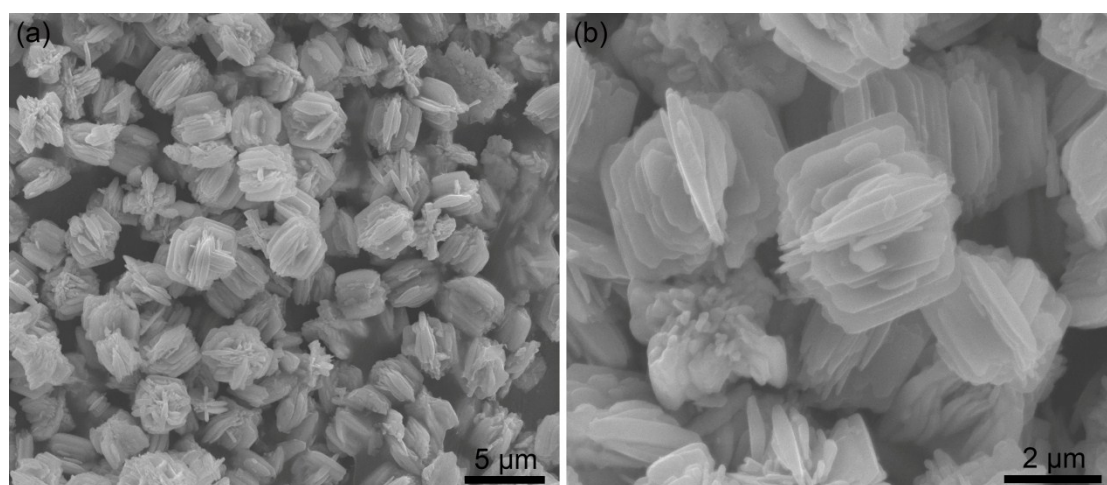

**Fig. S1** SEM images of calcined CuO hierarchical structures obtained after annealing at 500 °C for 3 h. (a) low magnification; (b) high magnification.

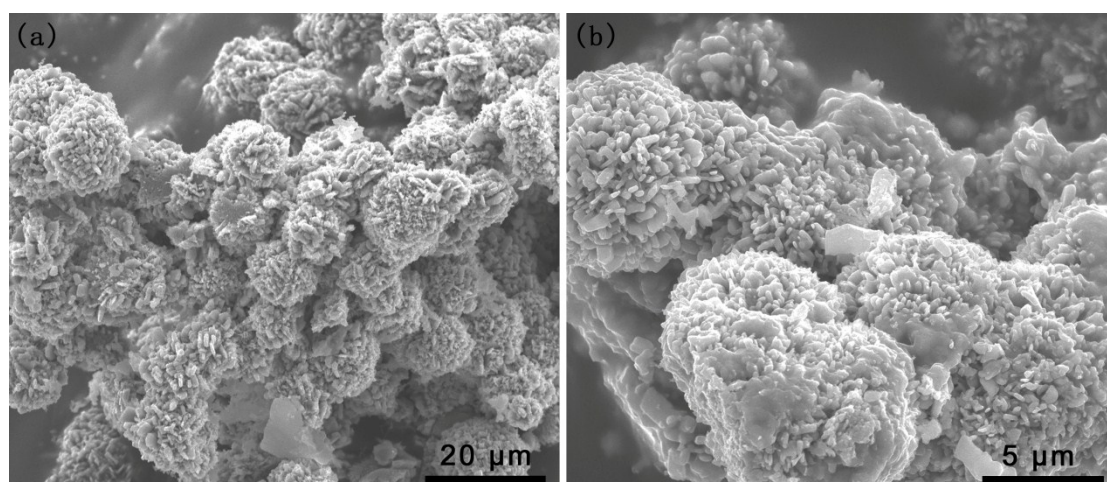

**Fig. S2** SEM images of CuO nanosheet aggregates obtained by the direct combustion of copper nitrate powder at 600 °C for 2 h. (a) low magnification; (b) high magnification.

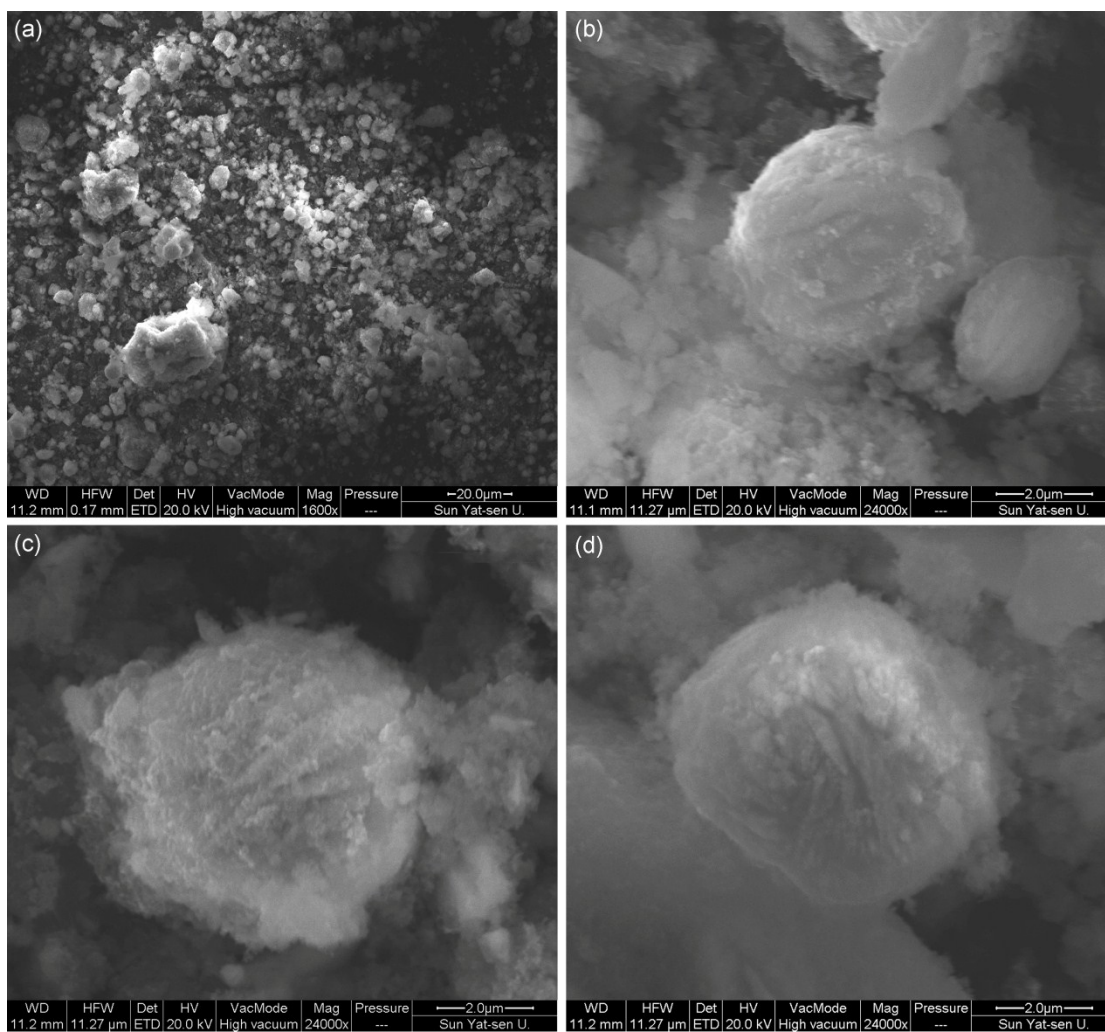

**Fig. S3** FESEM images of uncalcined CuO hierarchical structures after 100 cycles at a current density of 2 C.
